# Supplementary material for: Risk Assessment of Dietary Exposure to Organophosphorus Flame Retardants in Children by Using HBM-Data
Source: MDPI journal article supplement (doi:10.3390/toxics10050234), 2022-05-03
Supplement: s1 [file s1]

# Supplementary Materials: Risk Assessment of Dietary Exposure to Organophosphorus Flame Retardants in Children by Using HBM-Data

Veronika Plichta, Johann Steinwider, Nina Vogel, Till Weber, Marike Kolossa-Gehring, Lubica Palkovičová Murínová, Soňa Wimmerová, Janja Snoj Tratnik, Milena Horvat, Gudrun Koppen, Eva Govarts, Liese Gilles, Laura Rodriguez Martin, Greet Schoeters, Adrian Covaci, Clémence Fillol, Loïc Rambaud, Tina Kold Jensen and Elke Rauscher-Gabernig

**Table S1.** Detailed description of the used HBM studies.

| HBM study             | Country/<br>EU Region  | Age in<br>years | Sampling<br>periode | Urine sample           | Sex (%)          | Residential degree<br>(%)                                |
|-----------------------|------------------------|-----------------|---------------------|------------------------|------------------|----------------------------------------------------------|
| 3xG Study             | Belgium<br>(EU west)   | 6-8             | 2019-2020           | First morning<br>urine | 50 (f)<br>50 (m) | Towns/Suburbs<br>(100)                                   |
| OCC Study             | Denmark<br>(EU north)  | 6-7             | 2018-2019           | Spot urine             | 45 (f) 55<br>(m) | Cities (100)                                             |
| Esteban<br>study      | France<br>(EU west)    | 6-12            | 2014-2016           | First morning<br>urine | 46 (f)<br>54 (m) | Rural areas (48)<br>Towns/Suburbs<br>(27)<br>Cities (25) |
| GerES V sub-<br>study | Germany<br>(EU west)   | 6-12            | 2015-2018           | First morning<br>urine | 50 (f)<br>50 (m) | Towns/Suburbs<br>(44)<br>Rural areas (34)<br>Cities (22) |
| SLO CRP<br>study      | Slovenia<br>(EU south) | 7-10            | 2018                | First morning<br>urine | 55 (f)<br>45 (m) | Rural areas (100)                                        |
| PCB cohort<br>study   | Slovakia<br>(EU east)  | 10-12           | 2014-2017           | Spot urine             | 56 (f)<br>44 (m) | Rural areas (54)<br>Towns/Suburbs<br>(46)                |

**Table S2.** Estimated dietary TDCIPP exposure for children in Slovenia and Slovakia ( $\mu\text{g/kg}$  bw/day).

|                                                                                | Lower bound |        | Medium Bound |        | Upper Bound |        |
|--------------------------------------------------------------------------------|-------------|--------|--------------|--------|-------------|--------|
|                                                                                | mean        | high   | mean         | high   | mean        | high   |
| Animal and<br>vegetable fats and<br>oils and primary<br>derivatives<br>thereof | 0.01        | 0.01   | 0.01         | 0.032  | 0.032       | 0.069  |
| Whole Eggs                                                                     | 0           | 0      | 0.0002       | 0.0001 | 0.00005     | 0.0002 |
| Fish (meat)                                                                    | 0.00015     | 0.0010 | 0.0002       | 0.001  | 0.0002      | 0.0016 |
| Crustaceans                                                                    | 0.00        | 0.0000 | 0.000001     | 0.0003 | 0.000002    | 0.0007 |
| Grains and grain-<br>based products                                            | 0.00        | 0.0000 | 0.002        | 0.0025 | 0.003       | 0.005  |
| Meat and meat<br>products                                                      | 0           | 0      | 0.0002       | 0.0005 | 0.005       | 0.011  |

|                       |              |              |             |              |             |              |
|-----------------------|--------------|--------------|-------------|--------------|-------------|--------------|
| Milk                  | 0            | 0            | 0.001       | 0.0035       | 0.003       | 0.007        |
| Cheese                | 0.0022       | 0.0057       | 0.003       | 0.007        | 0.003       | 0.008        |
| <b>Total exposure</b> | <b>0.008</b> | <b>0.014</b> | <b>0.02</b> | <b>0.038</b> | <b>0.05</b> | <b>0.083</b> |

**Table S3.** Estimated dietary TCIPP exposure for children in Slovenia and Slovakia ( $\mu\text{g/kg}$  bw/day).

|                                                                    | Lower bound |             | Medium Bound |              | Upper Bound |              |
|--------------------------------------------------------------------|-------------|-------------|--------------|--------------|-------------|--------------|
|                                                                    | mean        | high        | mean         | high         | mean        | high         |
| Animal and vegetable fats and oils and primary derivatives thereof | 0.01        | 0.0218      | 0.0284       | 0.0614       | 0.06        | 0.132        |
| Whole Eggs                                                         | 0.00005     | 0.0002      | 0.0001       | 0.0002       | 0.00009     | 0.0003       |
| Fish (meat)                                                        | 0.0003      | 0.0019      | 0.0003       | 0.0020       | 0.0003      | 0.0021       |
| Crustaceans                                                        | 0.000001    | 0.0003      | 0.000001     | 0.0003       | 0.000001    | 0.0004       |
| Grains and grain-based products                                    | 0.03        | 0.0564      | 0.0343       | 0.0575       | 0.0351      | 0.059        |
| Meat and meat products                                             | 0.0005      | 0.0013      | 0.0008       | 0.0019       | 0.0011      | 0.0026       |
| Milk                                                               | 0           | 0           | 0.0053       | 0.0132       | 0.0106      | 0.026        |
| Cheese                                                             | 0.0013      | 0.0032      | 0.0014       | 0.0034       | 0.0014      | 0.004        |
| <b>Total exposure</b>                                              | <b>0.05</b> | <b>0.07</b> | <b>0.071</b> | <b>0.094</b> | <b>0.11</b> | <b>0.181</b> |

**Table S4.** Estimated dietary TCEP exposure for children in Slovenia and Slovakia ( $\mu\text{g/kg}$  bw/day).

|                                                                    | Lower bound |         | Medium Bound |         | Upper Bound |        |
|--------------------------------------------------------------------|-------------|---------|--------------|---------|-------------|--------|
|                                                                    | mean        | high    | mean         | high    | mean        | high   |
| Animal and vegetable fats and oils and primary derivatives thereof | 0.001       | 0.0031  | 0.0022       | 0.0047  | 0.0033      | 0.0071 |
| Whole Eggs                                                         | 0.000009    | 0.00003 | 0.00001      | 0.00005 | 0.00002     | 0.0001 |
| Fish (meat)                                                        | 0.00005     | 0.0003  | 0.00005      | 0.0003  | 0.0001      | 0.0004 |
| Crustaceans                                                        | 0.00        | 0.00    | 0.0000002    | 0.0001  | 0.0000004   | 0.0001 |
| Grains and grain-based products                                    | 0.006       | 0.0095  | 0.0057       | 0.0096  | 0.0059      | 0.01   |
| Meat and meat products                                             | 0.0004      | 0.0010  | 0.0006       | 0.0013  | 0.0007      | 0.0017 |
| Milk                                                               | 0           | 0       | 0.0015       | 0.0038  | 0.003       | 0.0074 |
| Cheese                                                             | 0.0006      | 0.0015  | 0.0006       | 0.0016  | 0.0007      | 0.0017 |

|                       |              |              |              |              |              |              |
|-----------------------|--------------|--------------|--------------|--------------|--------------|--------------|
| <b>Total exposure</b> | <b>0.008</b> | <b>0.012</b> | <b>0.011</b> | <b>0.015</b> | <b>0.014</b> | <b>0.018</b> |
|-----------------------|--------------|--------------|--------------|--------------|--------------|--------------|

**Table S5.** Estimated dietary TDCIPP exposure for children in Germany ( $\mu\text{g/kg bw/day}$ ).

|                                                                    | <b>Lower bound</b> |              | <b>Medium Bound</b> |              | <b>Upper Bound</b> |             |
|--------------------------------------------------------------------|--------------------|--------------|---------------------|--------------|--------------------|-------------|
|                                                                    | mean               | high         | mean                | high         | mean               | high        |
| Animal and vegetable fats and oils and primary derivatives thereof | 0.0033             | 0.0076       | 0.0093              | 0.0215       | 0.0200             | 0.046       |
| Whole Eggs                                                         | 0                  | 0            | 0.00003             | 0.0001       | 0.0001             | 0.0002      |
| Fish (meat)                                                        | 0.00009            | 0.0010       | 0.0001              | 0.0013       | 0.0001             | 0.0016      |
| Crustaceans                                                        | 0                  | 0            | 0.000001            | 0.0002       | 0.000002           | 0.0004      |
| Grains and grain-based products                                    | 0                  | 0            | 0.0013              | 0.0022       | 0.0025             | 0.0043      |
| Meat and meat products                                             | 0                  | 0            | 0.0022              | 0.0048       | 0.0044             | 0.0097      |
| Milk                                                               | 0                  | 0            | 0.0018              | 0.0044       | 0.0036             | 0.009       |
| Cheese                                                             | 0.0019             | 0.0057       | 0.0023              | 0.0070       | 0.0027             | 0.0083      |
| <b>Total exposure</b>                                              | <b>0.005</b>       | <b>0.010</b> | <b>0.017</b>        | <b>0.029</b> | <b>0.03</b>        | <b>0.06</b> |

**Table S6.** Estimated dietary TCIPP exposure for children in Germany ( $\mu\text{g/kg bw/day}$ ).

|                                                                    | <b>Lower bound</b> |              | <b>Medium Bound</b> |             | <b>Upper Bound</b> |              |
|--------------------------------------------------------------------|--------------------|--------------|---------------------|-------------|--------------------|--------------|
|                                                                    | mean               | high         | mean                | high        | mean               | high         |
| Animal and vegetable fats and oils and primary derivatives thereof | 0.01               | 0.0147       | 0.0179              | 0.0415      | 0.04               | 0.0893       |
| Whole Eggs                                                         | 0.00007            | 0.0002       | 0.0001              | 0.0003      | 0.00013            | 0.0004       |
| Fish (meat)                                                        | 0.00015            | 0.0018       | 0.0002              | 0.002       | 0.00017            | 0.0021       |
| Crustaceans                                                        | 0.0000007          | 0.0002       | 0.000001            | 0.0002      | 0.000001           | 0.0003       |
| Grains and grain-based products                                    | 0.029              | 0.0502       | 0.03                | 0.051       | 0.03               | 0.052        |
| Meat and meat products                                             | 0.0005             | 0.0011       | 0.0008              | 0.0017      | 0.0011             | 0.0023       |
| Milk                                                               | 0                  | 0            | 0.007               | 0.017       | 0.013              | 0.033        |
| Cheese                                                             | 0.0010             | 0.0032       | 0.0011              | 0.0035      | 0.0012             | 0.0037       |
| <b>Total exposure</b>                                              | <b>0.037</b>       | <b>0.058</b> | <b>0.06</b>         | <b>0.08</b> | <b>0.085</b>       | <b>0.136</b> |

**Table S7.** Estimated dietary TCEP exposure for children in Germany (µg/kg bw/day).

|                                                                    | Lower bound  |              | Medium Bound |              | Upper Bound   |               |
|--------------------------------------------------------------------|--------------|--------------|--------------|--------------|---------------|---------------|
|                                                                    | mean         | high         | mean         | high         | mean          | high          |
| Animal and vegetable fats and oils and primary derivatives thereof | 0            | 0.0021       | 0.0014       | 0.0032       | 0.0021        | 0.0048        |
| Whole Eggs                                                         | 0.000013     | 0.0000       | 0.00002      | 0.0001       | 0.00003       | 0.0001        |
| Fish (meat)                                                        | 0.00003      | 0.0003       | 0.00003      | 0.0003       | 0.00003       | 0.0004        |
| Crustaceans                                                        | 0.00         | 0.00         | 0.0000001    | 0.00004      | 0.0000003     | 0.0001        |
| Grains and grain-based products                                    | 0.005        | 0.0084       | 0.0050       | 0.0086       | 0.0051        | 0.0088        |
| Meat and meat products                                             | 0.0004       | 0.0009       | 0.0005       | 0.0012       | 0.0007        | 0.0015        |
| Milk                                                               | 0            | 0            | 0.0019       | 0.0048       | 0.0038        | 0.0094        |
| Cheese                                                             | 0.0005       | 0.0015       | 0.0005       | 0.0016       | 0.0006        | 0.0018        |
| <b>Total exposure</b>                                              | <b>0.007</b> | <b>0.010</b> | <b>0.009</b> | <b>0.013</b> | <b>0.0123</b> | <b>0.0160</b> |

**Table S8.** Estimated dietary TDCIPP exposure for children in Belgium (µg/kg bw/day).

|                                                                    | Lower bound  |             | Medium Bound |              | Upper Bound |             |
|--------------------------------------------------------------------|--------------|-------------|--------------|--------------|-------------|-------------|
|                                                                    | mean         | high        | mean         | high         | mean        | high        |
| Animal and vegetable fats and oils and primary derivatives thereof | 0.0027       | 0.0074      | 0.0077       | 0.0208       | 0.016       | 0.045       |
| Whole Eggs                                                         | 0            | 0           | 0.000001     | 0.0001       | 0.000001    | 0.0001      |
| Fish (meat)                                                        | 0.00014      | 0.0017      | 0.0002       | 0.0022       | 0.0002      | 0.0026      |
| Crustaceans                                                        | 0            | 0           | 0.000011     | 0.0006       | 0.000022    | 0.0011      |
| Grains and grain-based products                                    | 0            | 0           | 0.0012       | 0.002        | 0.0023      | 0.0039      |
| Meat and meat products                                             | 0            | 0           | 0.0033       | 0.007        | 0.0067      | 0.015       |
| Milk                                                               | 0            | 0           | 0.002        | 0.0057       | 0.004       | 0.01        |
| Cheese                                                             | 0.0027       | 0.01        | 0.0034       | 0.013        | 0.004       | 0.016       |
| <b>Total exposure</b>                                              | <b>0.006</b> | <b>0.01</b> | <b>0.018</b> | <b>0.031</b> | <b>0.03</b> | <b>0.06</b> |

**Table S9.** Estimated dietary TCIPP exposure for children in Belgium ( $\mu\text{g/kg bw/day}$ ).

|                                                                    | Lower bound  |              | Medium Bound |              | Upper Bound  |              |
|--------------------------------------------------------------------|--------------|--------------|--------------|--------------|--------------|--------------|
|                                                                    | mean         | high         | mean         | high         | mean         | high         |
| Animal and vegetable fats and oils and primary derivatives thereof | 0.01         | 0.014        | 0.014        | 0.04         | 0.03         | 0.086        |
| Whole Eggs                                                         | 0.000001     | 0.0001       | 0.000002     | 0.0002       | 0.000002     | 0.003        |
| Fish (meat)                                                        | 0.00025      | 0.0031       | 0.003        | 0.0033       | 0.00028      | 0.0035       |
| Crustaceans                                                        | 0.0000090    | 0.0005       | 0.000011     | 0.0006       | 0.000013     | 0.0007       |
| Grains and grain-based products                                    | 0.026        | 0.045        | 0.027        | 0.046        | 0.03         | 0.047        |
| Meat and meat products                                             | 0.0008       | 0.0017       | 0.0012       | 0.0027       | 0.0016       | 0.0036       |
| Milk                                                               | 0            | 0            | 0.0073       | 0.022        | 0.015        | 0.043        |
| Cheese                                                             | 0.0015       | 0.0062       | 0.0017       | 0.0067       | 0.0018       | 0.0071       |
| <b>Total exposure</b>                                              | <b>0.034</b> | <b>0.053</b> | <b>0.052</b> | <b>0.072</b> | <b>0.078</b> | <b>0.132</b> |

**Table S10.** Estimated dietary TDCIPP exposure for children in Denmark ( $\mu\text{g/kg bw/day}$ ).

|                                                                    | Lower bound  |              | Medium Bound |              | Upper Bound |              |
|--------------------------------------------------------------------|--------------|--------------|--------------|--------------|-------------|--------------|
|                                                                    | mean         | high         | mean         | high         | mean        | high         |
| Animal and vegetable fats and oils and primary derivatives thereof | 0.0065       | 0.0125       | 0.0183       | 0.0354       | 0.0395      | 0.0763       |
| Whole Eggs                                                         | 0            | 0            | 0.000025     | 0.0001       | 0.000050    | 0.0001       |
| Fish (meat)                                                        | 0.00016      | 0.0006       | 0.0002       | 0.0008       | 0.0002      | 0.0009       |
| Crustaceans                                                        | 0            | 0            | 0.000007     | 0.0001       | 0.000013    | 0.0002       |
| Grains and grain-based products                                    | 0            | 0            | 0.0012       | 0.0019       | 0.0024      | 0.0037       |
| Meat and meat products                                             | 0            | 0            | 0.0031       | 0.0053       | 0.0062      | 0.0106       |
| Milk                                                               | 0            | 0            | 0.0036       | 0.0075       | 0.0074      | 0.0153       |
| Cheese                                                             | 0.0018       | 0.0047       | 0.0023       | 0.0058       | 0.0027      | 0.0069       |
| <b>Total exposure</b>                                              | <b>0.008</b> | <b>0.015</b> | <b>0.029</b> | <b>0.046</b> | <b>0.06</b> | <b>0.095</b> |

**Table S11.** Estimated dietary TCIPP exposure for children in Denmark ( $\mu\text{g/kg bw/day}$ ).

|                                                                    | Lower bound  |              | Medium Bound |              | Upper Bound  |              |
|--------------------------------------------------------------------|--------------|--------------|--------------|--------------|--------------|--------------|
|                                                                    | mean         | high         | mean         | high         | mean         | high         |
| Animal and vegetable fats and oils and primary derivatives thereof | 0.01         | 0.0242       | 0.0353       | 0.0682       | 0.08         | 0.1469       |
| Whole Eggs                                                         | 0.000050     | 0.0001       | 0.000075     | 0.0002       | 0.000095     | 0.0003       |
| Fish (meat)                                                        | 0.00028      | 0.0011       | 0.0003       | 0.0012       | 0.00032      | 0.0012       |
| Crustaceans                                                        | 0.0000054    | 0.0001       | 0.000007     | 0.0001       | 0.000008     | 0.0001       |
| Grains and grain-based products                                    | 0.028        | 0.0424       | 0.0282       | 0.0433       | 0.03         | 0.044        |
| Meat and meat products                                             | 0.0007       | 0.0013       | 0.0011       | 0.0019       | 0.0015       | 0.0026       |
| Milk                                                               | 0            | 0            | 0.0138       | 0.0285       | 0.027        | 0.057        |
| Cheese                                                             | 0.0010       | 0.0027       | 0.0011       | 0.0029       | 0.0012       | 0.0031       |
| <b>Total exposure</b>                                              | <b>0.042</b> | <b>0.057</b> | <b>0.080</b> | <b>0.113</b> | <b>0.135</b> | <b>0.206</b> |

**Table S12.** Estimated dietary TDCIPP exposure for children in France ( $\mu\text{g/kg bw/day}$ ).

|                                                                    | Lower bound  |              | Medium Bound |              | Upper Bound |              |
|--------------------------------------------------------------------|--------------|--------------|--------------|--------------|-------------|--------------|
|                                                                    | mean         | high         | mean         | high         | mean        | high         |
| Animal and vegetable fats and oils and primary derivatives thereof | 0.0035       | 0.0086       | 0.0100       | 0.0241       | 0.0215      | 0.0520       |
| Whole Eggs                                                         | 0            | 0            | 0.000003     | 0.00004      | 0.000005    | 0.0001       |
| Fish (meat)                                                        | 0.00022      | 0.0016       | 0.0003       | 0.0020       | 0.0003      | 0.0024       |
| Crustaceans                                                        | 0            | 0            | 0.000009     | 0.0004       | 0.000018    | 0.0008       |
| Grains and grain-based products                                    | 0            | 0            | 0.0013       | 0.0022       | 0.0025      | 0.0043       |
| Meat and meat products                                             | 0            | 0            | 0.0035       | 0.0073       | 0.0071      | 0.0147       |
| Milk                                                               | 0            | 0            | 0.0021       | 0.0056       | 0.0043      | 0.0115       |
| Cheese                                                             | 0.0052       | 0.0153       | 0.0063       | 0.0188       | 0.0075      | 0.0222       |
| <b>Total exposure</b>                                              | <b>0.009</b> | <b>0.019</b> | <b>0.023</b> | <b>0.038</b> | <b>0.04</b> | <b>0.074</b> |

**Table S13.** Estimated dietary TCIPP exposure for children in France ( $\mu\text{g/kg bw/day}$ ).

|                                                                    | Lower bound  |              | Medium Bound |              | Upper Bound  |              |
|--------------------------------------------------------------------|--------------|--------------|--------------|--------------|--------------|--------------|
|                                                                    | mean         | high         | mean         | high         | mean         | high         |
| Animal and vegetable fats and oils and primary derivatives thereof | 0.007        | 0.0165       | 0.0192       | 0.0465       | 0.04         | 0.1001       |
| Whole Eggs                                                         | 0.000005     | 0.0001       | 0.000008     | 0.0001       | 0.00001      | 0.0002       |
| Fish (meat)                                                        | 0.00038      | 0.0028       | 0.0004       | 0.0030       | 0.00043      | 0.0032       |
| Crustaceans                                                        | 0.000007     | 0.0003       | 0.000009     | 0.0004       | 0.00001      | 0.0005       |
| Grains and grain-based products                                    | 0.029        | 0.0500       | 0.0293       | 0.0510       | 0.03         | 0.052        |
| Meat and meat products                                             | 0.0008       | 0.0017       | 0.0013       | 0.0027       | 0.0017       | 0.0036       |
| Milk                                                               | 0            | 0            | 0.0080       | 0.0214       | 0.016        | 0.042        |
| Cheese                                                             | 0.0029       | 0.0086       | 0.0031       | 0.0093       | 0.0033       | 0.0099       |
| <b>Total exposure</b>                                              | <b>0.040</b> | <b>0.061</b> | <b>0.061</b> | <b>0.083</b> | <b>0.093</b> | <b>0.152</b> |

**Table S14.** Dietary exposure estimation from each cohort in  $\mu\text{g/kg bw/d}$  and its contribution to the estimated intake and its relation to the RfD of 15  $\mu\text{g/kg bw/d}$  (for TDCIPP) or 80  $\mu\text{g/kg bw/d}$  (for TCIPP) and a p-RfD of 7  $\mu\text{g/kg bw/d}$  (for TCEP) in percent.

|                 | Estimated daily intake |          |       |          | Dietary intake lower bound |          |          |        |          |          | Dietary intake medium bound |          |          |       |          |          | Dietary intake upper bound |          |          |       |          |          |
|-----------------|------------------------|----------|-------|----------|----------------------------|----------|----------|--------|----------|----------|-----------------------------|----------|----------|-------|----------|----------|----------------------------|----------|----------|-------|----------|----------|
|                 | mean                   | % of RfD | high  | % of RfD | mean                       | % of EDI | % of RfD | high   | % of EDI | % of RfD | mean                        | % of EDI | % of RfD | high  | % of EDI | % of RfD | mean                       | % of EDI | % of RfD | high  | % of EDI | % of RfD |
| <b>Belgium</b>  |                        |          |       |          |                            |          |          |        |          |          |                             |          |          |       |          |          |                            |          |          |       |          |          |
| TDCIPP          | 0.05                   | 0.3      | 0.15  | 1        | 0.006                      | 12       | 0.04     | 0.01   | 7        | 0.09     | 0.018                       | 37       | 0.12     | 0.031 | 21       | 0.2      | 0.03                       | 70       | 0.22     | 0.06  | 43       | 0.41     |
| TCIPP           | -                      | -        | 0.06  | 0.08     | 0.034                      | -        | 0.04     | 0.05   | 84       | 0.07     | 0.05                        | -        | 0.07     | 0.072 | 113      | 0.09     | 0.07                       | -        | 0.1      | 0.13  | 208      | 0.16     |
| $\Sigma$ OPFR   | -                      | -        | 0.21  |          | 0.04                       |          |          | 0.06   |          |          | 0.07                        |          |          | 0.103 |          |          | 0.1                        |          |          | 0.2   |          |          |
| Hazard Index    |                        |          | 0.01  |          | 0.0008                     |          |          | 0.0016 |          |          | 0.002                       |          |          | 0.003 |          |          | 0.003                      |          |          | 0.006 |          |          |
| <b>Denmark</b>  |                        |          |       |          |                            |          |          |        |          |          |                             |          |          |       |          |          |                            |          |          |       |          |          |
| TDCIPP          | 0.03                   | 0.2      | 0.13  | 0.9      | 0.008                      | 25       | 0.06     | 0.015  | 11       | 0.1      | 0.029                       | 85       | 0.2      | 0.046 | 35       | 0.3      | 0.06                       | 173      | 0.4      | 0.09  | 72       | 0.6      |
| TCIPP           | -                      | -        | 0.02  | 0.03     | 0.042                      | -        | 0.05     | 0.057  | 259      | 0.07     | 0.08                        | -        | 0.1      | 0.113 | 512      | 0.14     | 0.13                       |          | 0.17     | 0.21  | 936      | 0.26     |
| $\Sigma$ OPFR   | -                      | -        | 0.15  |          | 0.05                       |          |          | 0.07   |          |          | 0.11                        |          |          | 0.16  |          |          | 0.19                       |          |          | 0.3   |          |          |
| Hazard Index    |                        |          | 0.009 |          | 0.001                      |          |          | 0.002  |          |          | 0.003                       |          |          | 0.004 |          |          | 0.006                      |          |          | 0.009 |          |          |
| <b>France</b>   |                        |          |       |          |                            |          |          |        |          |          |                             |          |          |       |          |          |                            |          |          |       |          |          |
| TDCIPP          | 0.06                   | 0.4      | 0.18  | 1.2      | 0.009                      | 14       | 0.06     | 0.019  | 11       | 0.13     | 0.02                        | 37       | 0.16     | 0.04  | 21       | 0.25     | 0.04                       | 68       | 0.3      | 0.07  | 41       | 0.5      |
| TCIPP           | -                      | -        | 0.17  | 0.2      | 0.04                       |          | 0.05     | 0.06   | 36       | 0.08     | 0.06                        |          | 0.08     | 0.08  | 49       | 0.1      | 0.09                       |          | 0.12     | 0.15  | 90       | 0.19     |
| $\Sigma$ OPFR   |                        |          | 0.35  |          | 0.05                       |          |          | 0.08   |          |          | 0.085                       |          |          | 0.121 |          |          | 0.14                       |          |          | 0.225 |          |          |
| Hazard Index    |                        |          | 0.01  |          | 0.001                      |          |          | 0.002  |          |          | 0.002                       |          |          | 0.003 |          |          | 0.004                      |          |          | 0.007 |          |          |
| <b>Germany</b>  |                        |          |       |          |                            |          |          |        |          |          |                             |          |          |       |          |          |                            |          |          |       |          |          |
| TDCIPP          | 0.05                   | 0.3      | 0.15  | 1        | 0.005                      | 11       | 0.03     | 0.01   | 7        | 0.06     | 0.017                       | 35       | 0.01     | 0.03  | 20       | 0.2      | 0.03                       | 69       | 0.22     | 0.06  | 41       | 0.4      |
| TCIPP           | 0.005                  | 0.01     | 0.03  | 0.04     | 0.04                       | 745      | 0.05     | 0.06   | 173      | 0.07     | 0.06                        | 1130     | 0.07     | 0.08  | 231      | 0.10     | 0.08                       | 1696     | 0.11     | 0.14  | 402      | 0.17     |
| TCEP            | 0.02                   | 0.3      | 0.04  | 0.6      | 0.007                      | 31       | 0.1      | 0.01   | 24       | 0.15     | 0.01                        | 43       | 0.13     | 0.01  | 30       | 0.19     | 0.01                       | 57       | 0.18     | 0.01  | 37       | 0.23     |
| $\Sigma$ OPFR   | 0.075                  |          | 0.22  |          | 0.05                       |          |          | 0.08   |          |          | 0.08                        |          |          | 0.12  |          |          | 0.13                       |          |          | 0.21  |          |          |
| Hazard Index    | 0.006                  |          | 0.016 |          | 0.002                      |          |          | 0.003  |          |          | 0.003                       |          |          | 0.005 |          |          | 0.005                      |          |          | 0.008 |          |          |
| <b>Slovenia</b> |                        |          |       |          |                            |          |          |        |          |          |                             |          |          |       |          |          |                            |          |          |       |          |          |
| TDCIPP          | 0.04                   | 0.3      | 0.11  | 0.7      | 0.008                      | 19       | 0.05     | 0.014  | 13       | 0.09     | 0.02                        | 52       | 0.14     | 0.04  | 35       | 0.25     | 0.05                       | 113      | 0.3      | 0.08  | 76       | 0.5      |
| TCIPP           | -                      |          | 0.03  | 0.03     | 0.05                       | -        | 0.06     | 0.07   | 252      | 0.09     | 0.07                        | -        | 0.09     | 0.09  | 344      | 0.12     | 0.1                        | -        | 0.14     | 0.18  | 664      | 0.23     |

|              |   |      |      |       |   |      |       |    |      |       |   |      |       |     |      |       |   |      |       |     |      |
|--------------|---|------|------|-------|---|------|-------|----|------|-------|---|------|-------|-----|------|-------|---|------|-------|-----|------|
| TCEP         | - | 0.21 | 3    | 0.008 | - | 0.12 | 0.012 | 6  | 0.17 | 0.01  | - | 0.15 | 0.015 | 7   | 0.21 | 0.014 | - | 0.2  | 0.018 | 8   | 0.25 |
| ΣOPFR        | - | 0.35 |      | 0.06  |   |      | 0.09  |    |      | 0.1   |   |      | 0.15  |     |      | 0.17  |   |      | 0.28  |     |      |
| Hazard Index |   | 0.04 |      | 0.002 |   |      | 0.003 |    |      | 0.004 |   |      | 0.006 |     |      | 0.006 |   |      | 0.01  |     |      |
| Slovakia     |   |      |      |       |   |      |       |    |      |       |   |      |       |     |      |       |   |      |       |     |      |
| TDCIPP       | - | 0.07 | 0.46 | 0.008 | - | 0.05 | 0.014 | 20 | 0.09 | 0.02  | - | 0.14 | 0.04  | 55  | 0.25 | 0.05  | - | 0.3  | 0.08  | 120 | 0.5  |
| TCIPP        | - | 0.08 | 0.10 | 0.05  | - | 0.06 | 0.07  | 84 | 0.09 | 0.07  | - | 0.09 | 0.09  | 120 | 0.12 | 0.1   | - | 0.14 | 0.18  | 232 | 0.23 |
| TCEP         | - | 0.17 | 2    | 0.008 | - | 0.12 | 0.012 | 7  | 0.17 | 0.01  | - | 0.15 | 0.015 | 9   | 0.21 | 0.014 | - | 0.2  | 0.018 | 10  | 0.25 |
| ΣOPFR        |   | 0.31 |      | 0.06  |   |      | 0.09  |    |      | 0.1   |   |      | 0.15  |     |      | 0.17  |   |      | 0.28  |     |      |
| Hazard Index |   | 0.03 |      | 0.002 |   |      | 0.003 |    |      | 0.004 |   |      | 0.006 |     |      | 0.006 |   |      | 0.01  |     |      |
